# Supplementary material for: Enhanced triboelectric properties of Eu2O3-doped BaTiO3/PVDF-HFP nanofibers
Source: Royal Society of Chemistry journal article supplement (doi:10.1039/d2nr05990h), 2023-01-01
Supplement: d2nr05990h4.pdf [file d2nr05990h4.pdf]

### Supporting Information

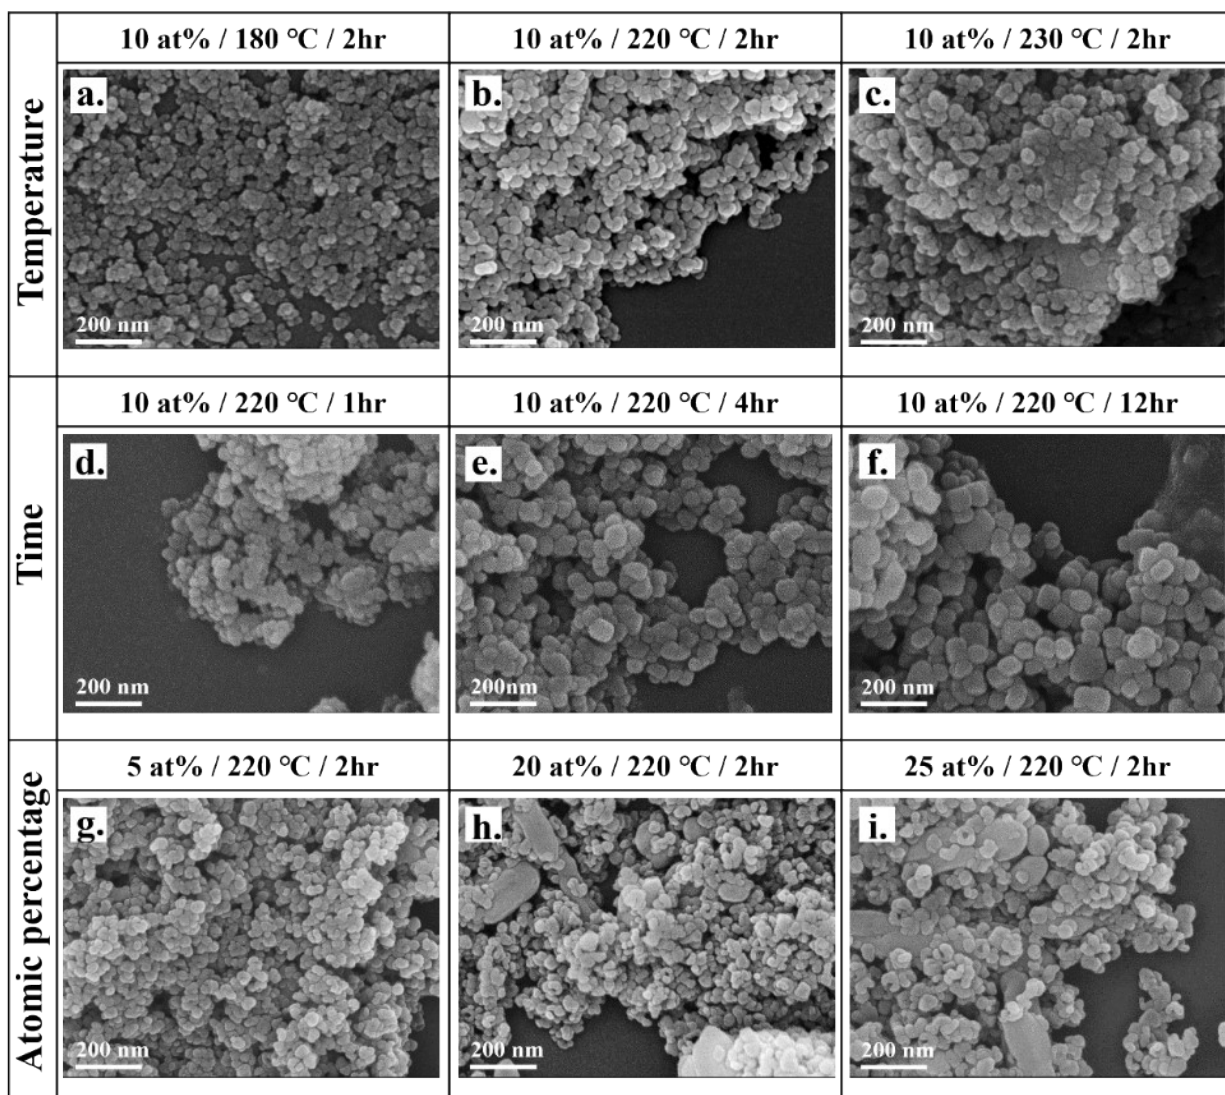

**Fig. S1** FE-SEM images of doped BaTiO<sub>3</sub> hollow structures synthesized at (a–c) 10 at% for 2 h at (a) 180, (b) 220, and (c) 230 °C; (d–f) 10 at% at 220 °C for (d) 1, (e) 4 h, and (f) 12 h; and (g–i) 220 °C for 2 h at (g) 5, (h) 20, and (i) 25 at%.

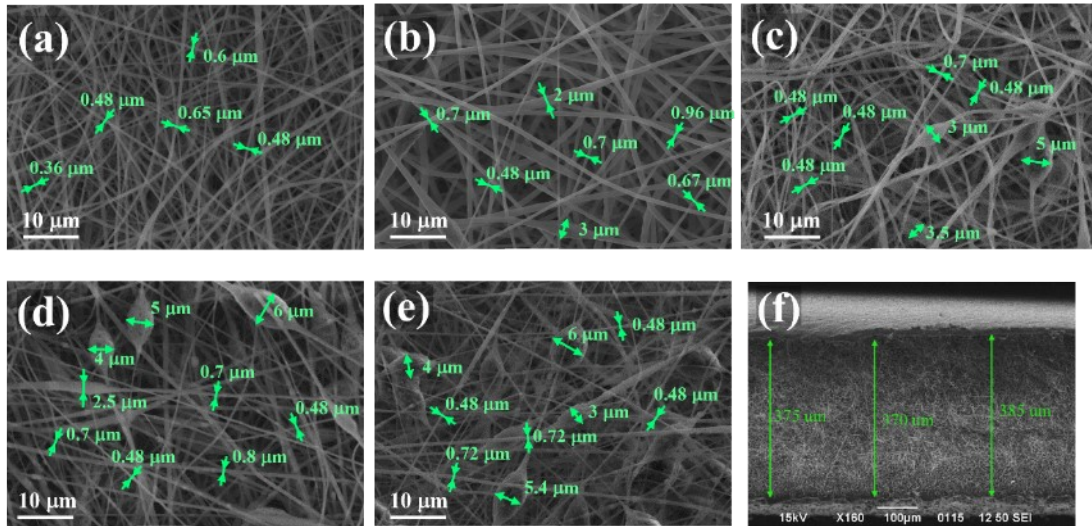

**Fig. S2** (a–e) SEM images of (a) 0, (b) 1, (c) 5, (d) 10, and (e) 15 wt%  $\text{Eu}_2\text{O}_3$ - $\text{BaTiO}_3$ /PVDF-HFP nanofibers. (f) SEM cross-section of 10 wt%  $\text{Eu}_2\text{O}_3$ - $\text{BaTiO}_3$ /PVDF-HFP nanofibers.

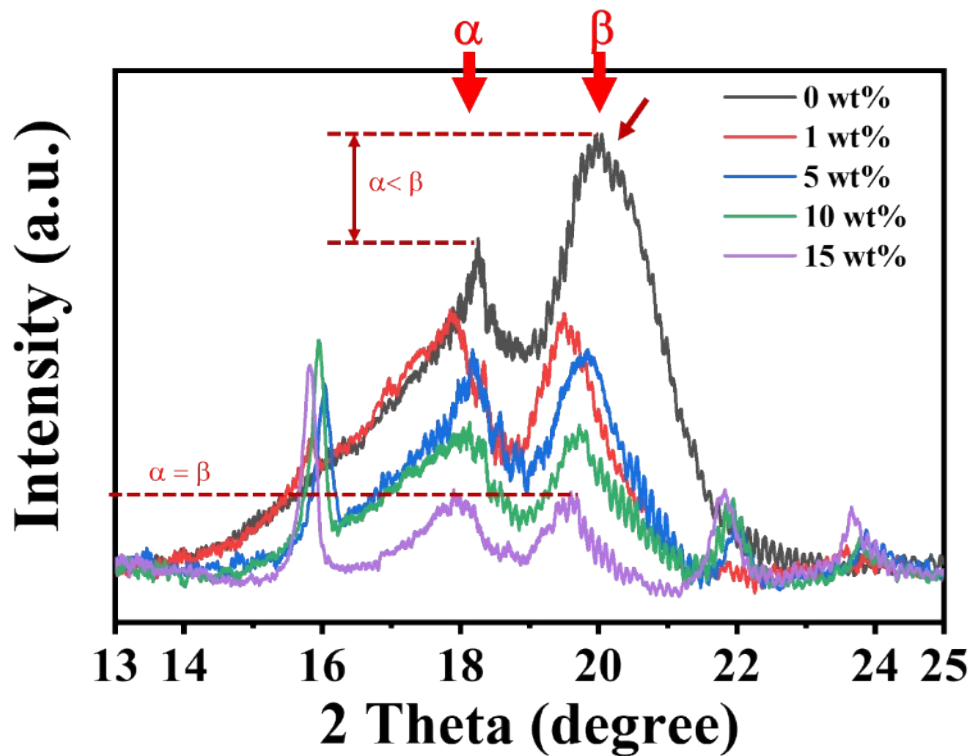

**Fig. S3** The XRD patterns of PVDF  $\alpha$  and  $\beta$  phase with different weight percentages of  $\text{Eu}_2\text{O}_3$ - $\text{BaTiO}_3$ /PVDF-HFP

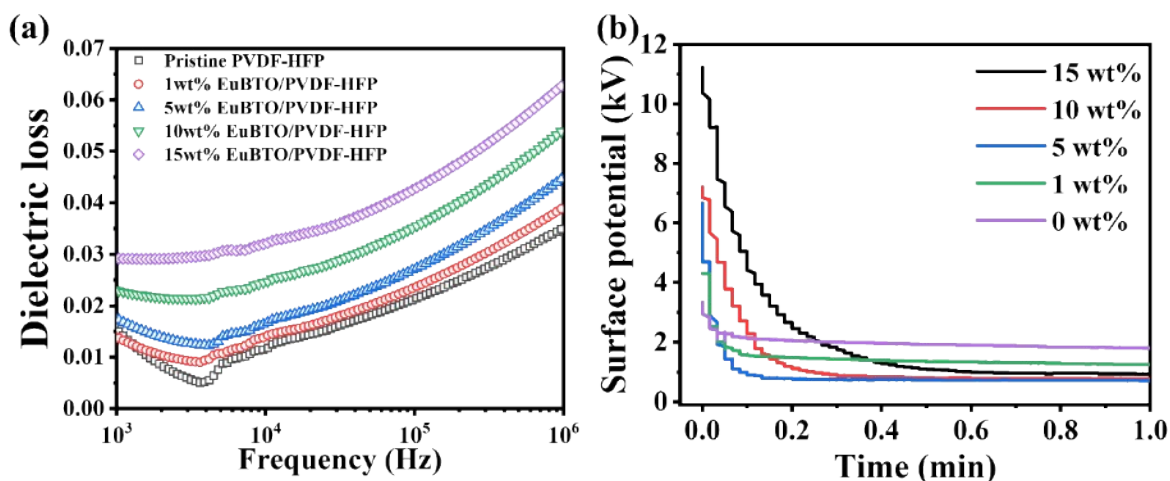

**Fig. S4** (a) Dielectric loss of various-weight-percentage  $\text{Eu}_2\text{O}_3$ - $\text{BaTiO}_3$ /PVDF-HFP nanofiber mats plotted with respect to frequency. (b) retention times of the surface potential for different percentages of  $\text{Eu}_2\text{O}_3$ -doped  $\text{BaTiO}_3$ /PVDF-HFP composite after contact friction with the Kapton film.

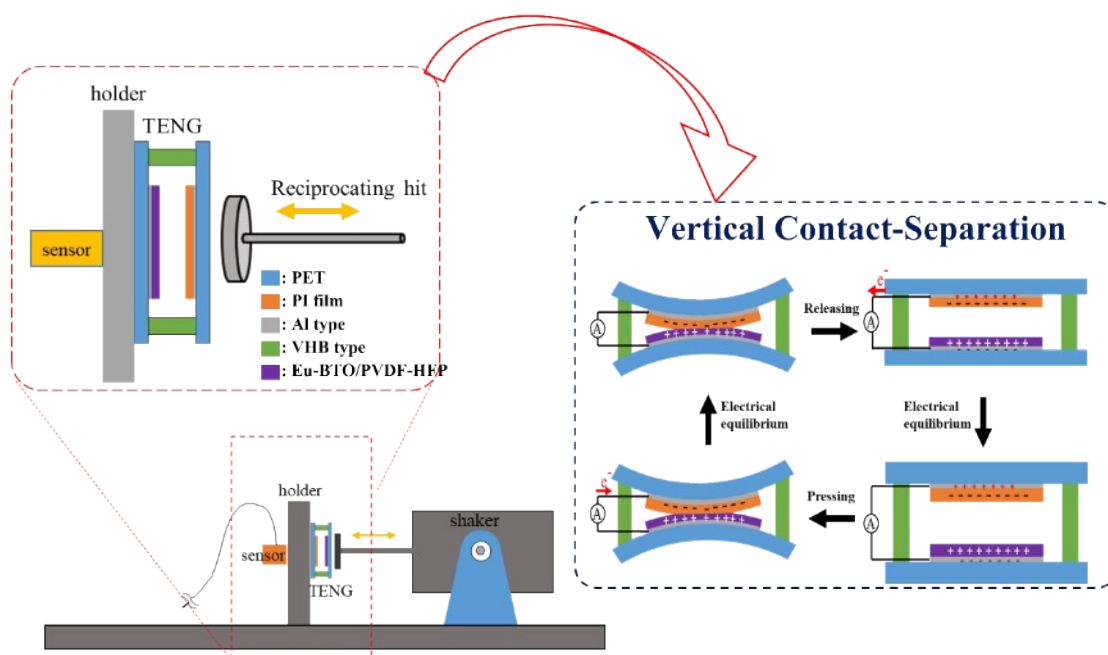

**Fig. S5** Schematic representation of the working mechanism of the electrospun  $\text{Eu}_2\text{O}_3$ - $\text{BaTiO}_3$ /PVDF-HFP electrospun-nanofiber TENG (device size: 1 cm  $\times$  1 cm).

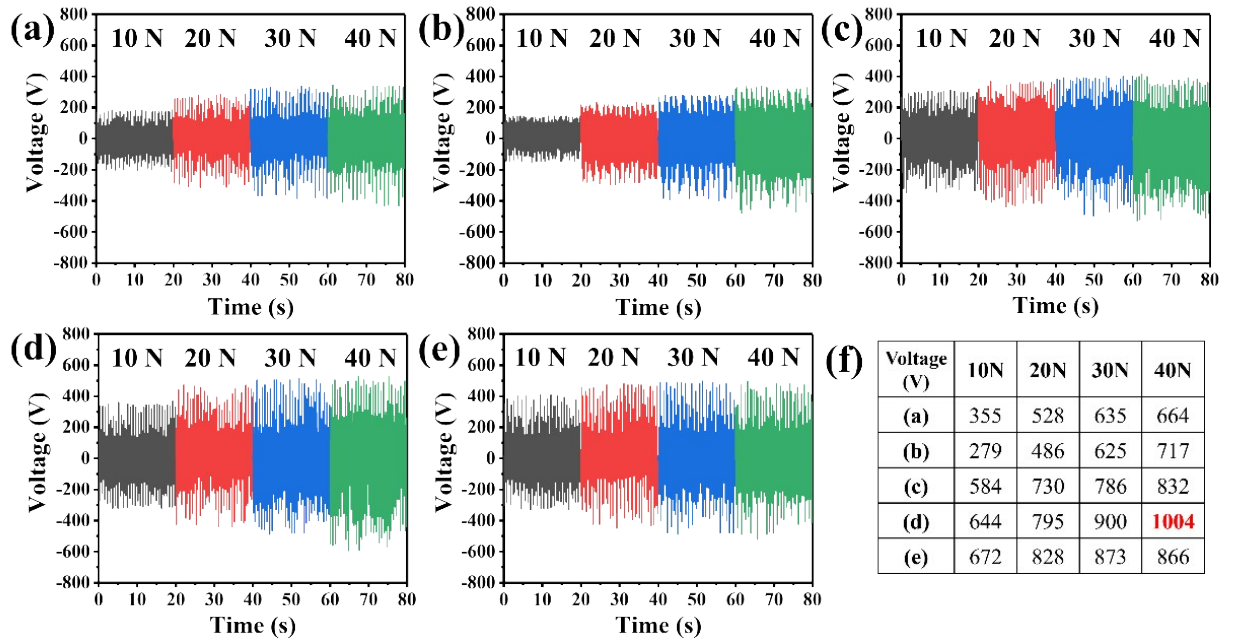

**Fig. S6** (a–e) Electrical output voltages of (a) 0, (b) 1, (c) 5, (d) 10, and (e) 15 wt%  $\text{Eu}_2\text{O}_3$ - $\text{BaTiO}_3$ /PVDF-HFP nanofibers, measured at various mechanical forces. (f) summarized the electrical output voltage of various weight percentage of  $\text{Eu}_2\text{O}_3$ - $\text{BaTiO}_3$ /PVDF-HFP nanofibers, measured at various mechanical forces.

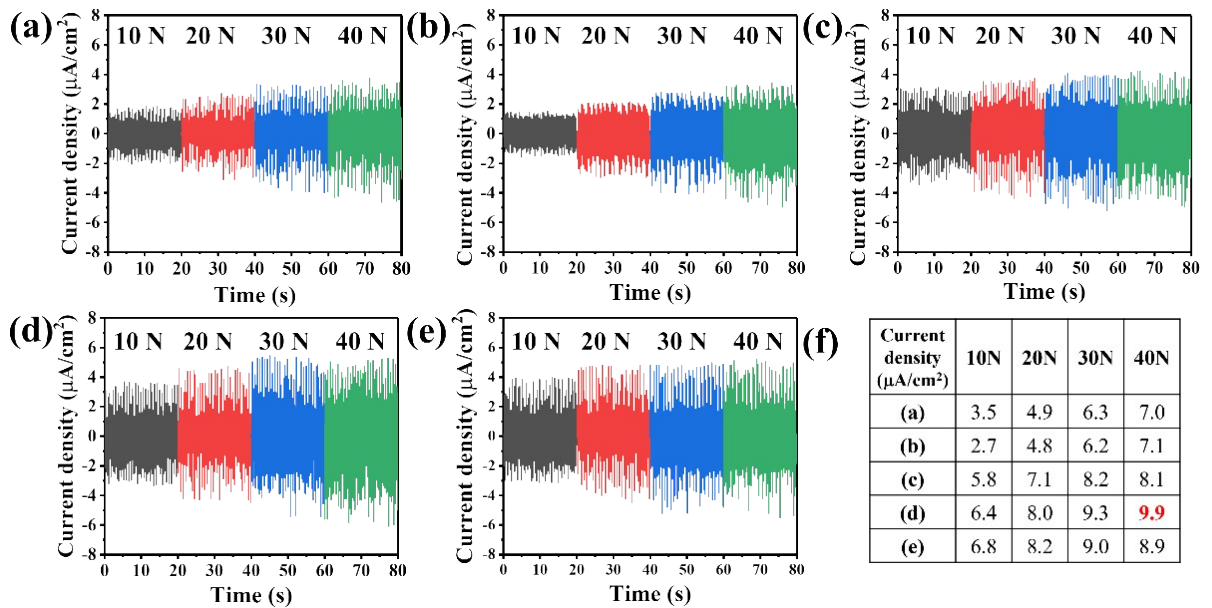

**Fig. S7** (a–e) Electrical output current densities of (a) 0, (b) 1, (c) 5, (d) 10, and (e) 15 wt%  $\text{Eu}_2\text{O}_3$ - $\text{BaTiO}_3$ /PVDF-HFP nanofibers, measured at various mechanical forces. (f) summarized the electrical output current density of various weight percentage of  $\text{Eu}_2\text{O}_3$ - $\text{BaTiO}_3$ /PVDF-HFP nanofibers, measured at various mechanical forces.

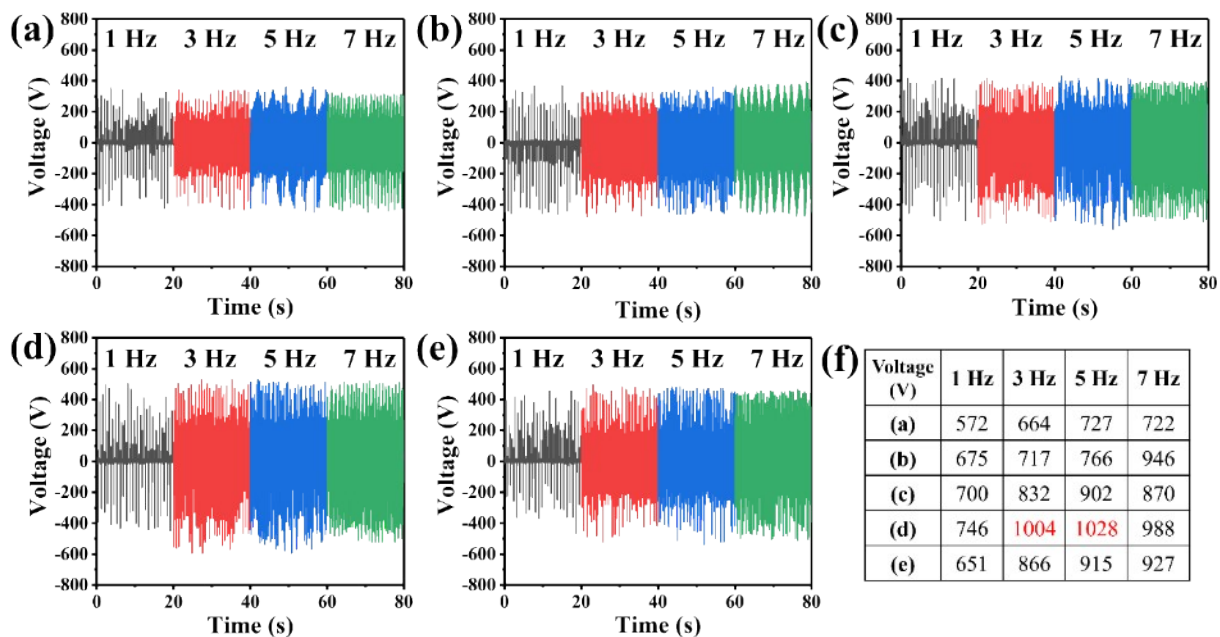

**Fig. S8** (a–e) Electrical output voltages of (a) 0, (b) 1, (c) 5, (d) 10, and (e) 15 wt%  $\text{Eu}_2\text{O}_3\text{-BaTiO}_3/\text{PVDF-HFP}$  nanofibers, measured at various frequencies. (f) summarized the electrical output voltage of various weight percentage of  $\text{Eu}_2\text{O}_3\text{-BaTiO}_3/\text{PVDF-HFP}$  nanofibers, measured at various frequencies.

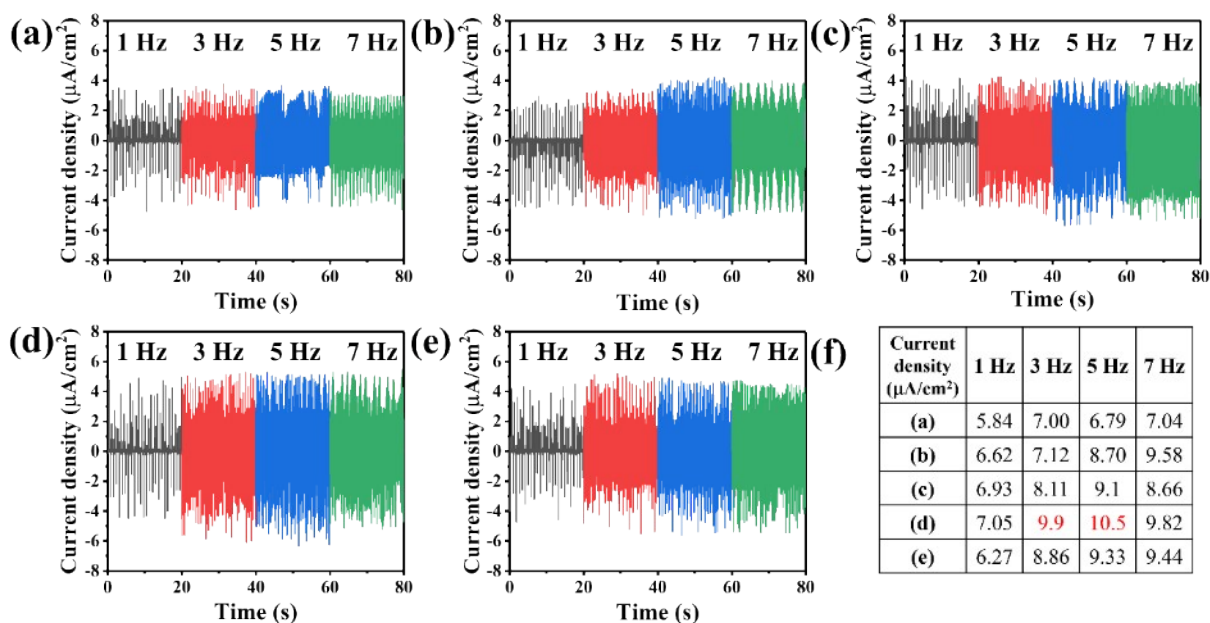

**Fig. S9** Electrical output current densities of (a) 0, (b) 1, (c) 5, (d) 10, and (e) 15 wt%  $\text{Eu}_2\text{O}_3\text{-BaTiO}_3/\text{PVDF-HFP}$  nanofibers, measured at various frequencies. (f) summarized the electrical output current densities of various weight percentage of  $\text{Eu}_2\text{O}_3\text{-BaTiO}_3/\text{PVDF-HFP}$  nanofibers, measured at various frequencies.

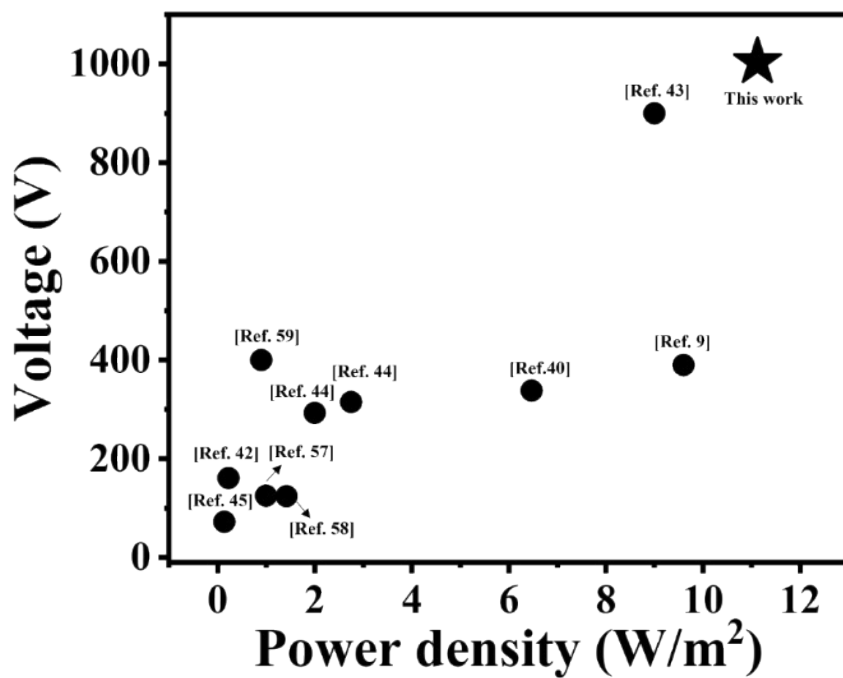

Fig. S10 Open-circuit voltages and peak power densities of TENGs reported herein and previously in the literature (Table 1).

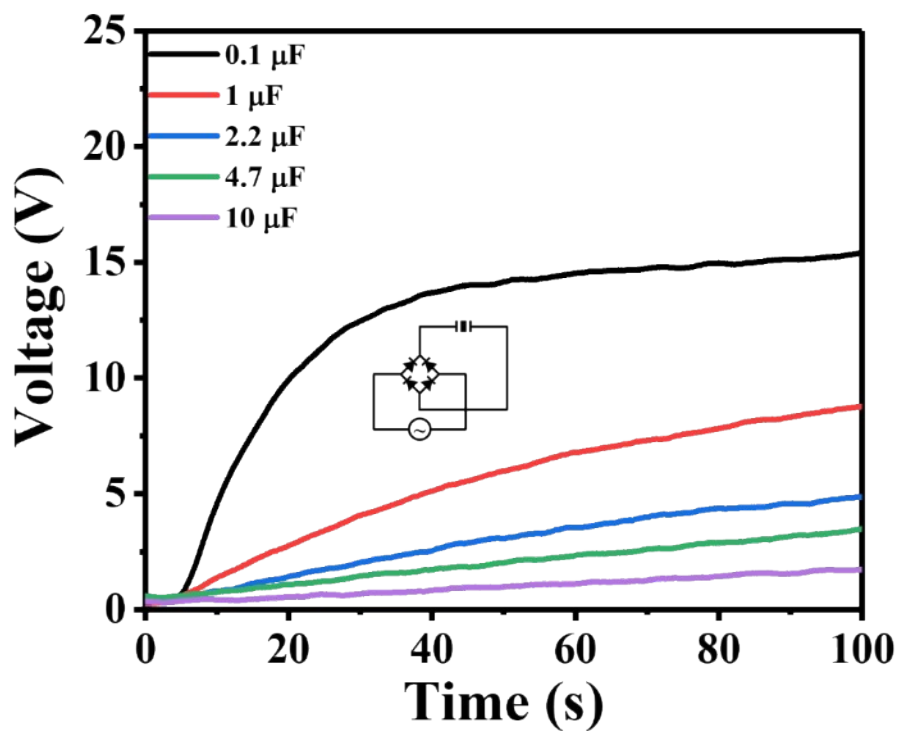

Fig. S11 Charging capacitors of various capacitances with pristine PVDF-HFP electrospun-nanofiber TENGs.
